# Supplementary material for: Nucleation density and pore size tunable growth of ZnO nanowalls by a facile solution approach: growth mechanism and NO2 gas sensing properties
Source: Royal Society of Chemistry journal article supplement (doi:10.1039/c9ra07933e), 2020-01-01
Supplement: c9ra07933e1.pdf [file c9ra07933e1.pdf]

## The Supporting Figures Caption

**Fig. S1** The TEM images of ZnO nanowalls: (a) TEM and (b) HRTEM.

**Fig. S2** The XRD patterns of the ZnO nanowalls morphology at the different *steps*: (a) *Step 1*, (b) *Step 2*, (c) *Step 3* and (d) *Step 4*.

**Fig. S3** FT-IR transmittance spectra of the products after *step1* and *step 2*: (a) *step1* and (b) *step1*.

**Fig. S4** The XRD patterns of the ZnO nanowalls at the different dipping times.

**Fig. S5** The XRD patterns of the ZnO nanowalls at the different growth time.

**Fig. S6** The solution after *step 3*.

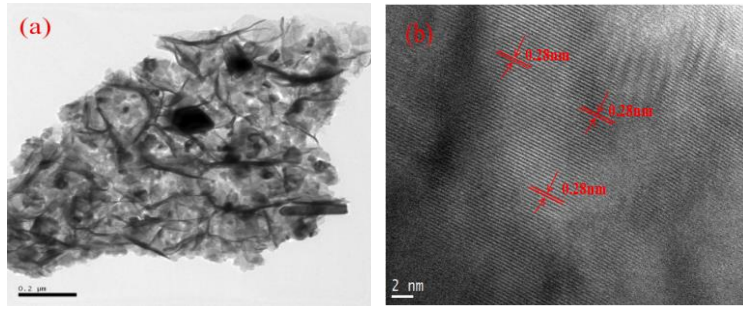

Fig. S1

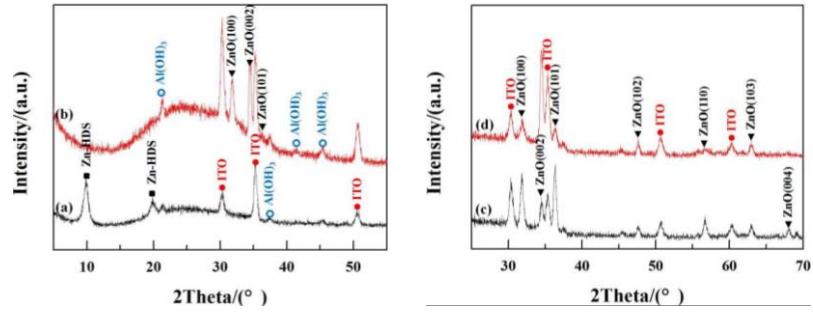

Fig. S2

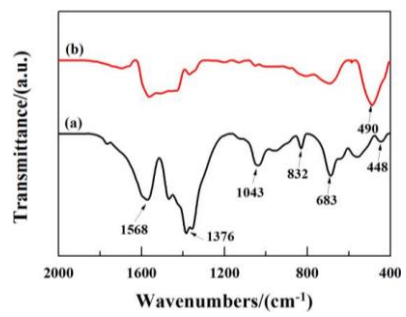

Fig. S3

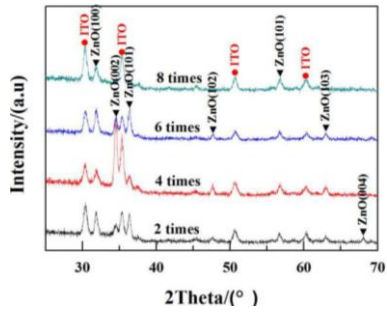

Fig. S4

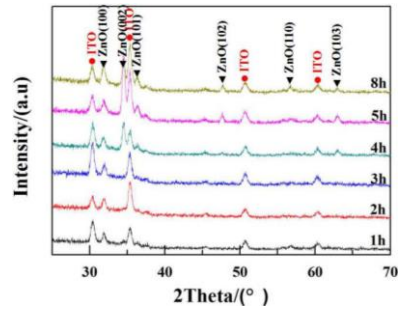

Fig. S5

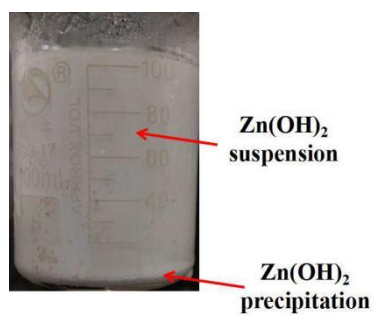

Fig. S6
